# Supplementary material for: Cellular receptors for mammalian viruses
Source: PLoS Pathog. 2024 Feb 20;20(2):e1012021. doi: 10.1371/journal.ppat.1012021 (PMC10906839; doi:10.1371/journal.ppat.1012021)
Supplement: S2 Table — The gene symbol, assigned score (probability of being a receptor), and whether the corresponding protein is a known receptor are indicated. (XLSX) [file ppat.1012021.s005.xlsx]

## Sheet: Hoja1
Gene	GBM_score	Known_receptor
ITGB1	0.932536	1
ITGB2	0.931093	1
CD36	0.924954	1
ITGA5	0.922728	1
EFNB1	0.917245	1
EPHA2	0.91656	1
APP	0.913739	0
ICAM1	0.908391	1
ITGAV	0.907859	1
ADAM17	0.907271	1
CEACAM1	0.902126	1
DPP4	0.899586	1
CXCR4	0.897099	1
ENG	0.896594	0
ITGB7	0.891756	1
CSF3R	0.890708	0
THBS1	0.890367	0
CD44	0.886129	0
CXCR3	0.882085	0
CD33	0.88119	0
EFNB2	0.881133	1
CD59	0.880368	0
CD9	0.87944	1
ALCAM	0.878821	0
CCR1	0.878041	1
FN1	0.876242	1
ITGAM	0.875894	1
CD226	0.873334	0
CD4	0.872075	1
ITGB3	0.87088	1
RHOB	0.8699	0
VCAM1	0.868824	1
AOC3	0.86801	0
ITGB4	0.866538	0
MCAM	0.862503	0
ITGAX	0.860743	1
ITGB5	0.857513	1
HBEGF	0.852308	1
CD22	0.84553	0
ATP1B1	0.8434	0
HLA-E	0.843121	0
SELL	0.842365	0
STAB1	0.840304	0
MME	0.840033	0
EPHB4	0.839356	0
CX3CL1	0.837666	0
CD74	0.83747	0
BST2	0.836284	0
NECTIN2	0.836104	1
KITLG	0.834973	0
SRC	0.832501	0
SIRPA	0.831144	0
GP1BA	0.827335	0
ITGAL	0.827083	1
CTNNB1	0.825212	0
ENTPD1	0.824263	0
FAT1	0.823569	0
IGF2R	0.822162	0
CD151	0.821905	1
MRC1	0.821741	1
CCR5	0.820635	1
ADAM10	0.820253	0
IL2RG	0.819531	0
HLA-DRB1	0.819015	0
CX3CR1	0.817781	1
CD47	0.817223	0
SELP	0.817157	0
PLAUR	0.81712	0
CD55	0.815766	1
TGFB1	0.81403	0
HLA-A	0.811417	0
DSG2	0.809837	0
FCGR2B	0.808802	0
CTLA4	0.808581	0
EPHA4	0.807345	1
NOTCH2	0.805086	0
CD46	0.802836	1
NRP2	0.802573	1
PVR	0.802262	1
ICAM3	0.801907	0
CD86	0.800961	1
ADAM9	0.799395	1
PDGFRB	0.798318	1
S1PR1	0.797961	0
NT5E	0.797546	0
TNFRSF10B	0.797469	0
TEK	0.796659	0
ACHE	0.795271	0
TNFRSF1A	0.795135	0
CD68	0.793835	0
NRP1	0.792551	1
CTNNA1	0.791812	0
LDLR	0.791693	1
TGFBR2	0.790884	0
C3	0.788294	0
BACE1	0.786894	0
CD163	0.78678	1
CALR	0.784888	0
HLA-B	0.784537	0
M6PR	0.781478	1
BSG	0.781307	1
CD276	0.780197	0
HSP90AB1	0.779037	1
LAMP2	0.778854	0
SLAMF1	0.77875	1
CD79B	0.778697	0
ADAM12	0.778519	0
F3	0.77718	0
CD300A	0.776792	1
CD14	0.776257	0
SCN1B	0.775943	0
PLAU	0.77539	0
FCGR3A	0.775282	0
SIGLEC9	0.774841	0
LPAR1	0.774689	0
ANO6	0.77433	0
ROBO1	0.774111	0
NID2	0.772168	0
SORT1	0.771786	0
SDC4	0.771718	1
GPNMB	0.771583	0
FAS	0.77115	0
NEO1	0.770811	0
TLR4	0.7701	0
AGTR1	0.769303	0
RPSA	0.769048	1
PTPRK	0.7686	0
ITGA7	0.767463	0
YES1	0.767273	0
TGFBR1	0.76717	0
ITGB6	0.766038	1
CTSK	0.7656	0
EFNA1	0.765412	1
ITGA2	0.764943	1
AMBP	0.764378	0
TNFRSF10A	0.764251	0
CD40	0.764227	0
SYMPK	0.764136	0
NECTIN1	0.764096	1
EGFR	0.763391	1
ITGA6	0.761815	1
HLA-DRA	0.761462	0
LRP5	0.761006	0
ITGA4	0.759422	1
LRP1	0.759171	1
HSPG2	0.759142	0
IL1R1	0.759075	0
ERBB2	0.758526	1
SEMA5A	0.75645	0
SIGLEC7	0.753655	1
PECAM1	0.7536	0
CD72	0.753529	0
FLT3LG	0.75238	0
CD48	0.751993	0
LY96	0.750937	0
FOLR1	0.75079	1
THBD	0.750085	0
IFNAR1	0.749755	0
CD81	0.748326	1
EMP2	0.747331	0
INSR	0.747108	0
F11R	0.746389	1
CD58	0.746182	0
IL13RA1	0.745966	0
PDGFRA	0.745864	1
IFNAR2	0.745268	0
SCARB1	0.744682	1
BCAM	0.744604	0
FURIN	0.744479	0
ACKR3	0.744079	1
ADA	0.743977	0
MFGE8	0.743741	0
CDH2	0.742106	0
CD80	0.742081	1
TGFA	0.74181	0
PSAP	0.741553	0
FCGR2A	0.741049	1
CCR7	0.740452	0
SDC2	0.739471	1
MET	0.738212	1
HLA-DQA1	0.736946	0
CSF1R	0.73627	0
PRNP	0.735673	0
CD274	0.735669	0
ITGA9	0.735545	0
FZD4	0.73544	0
IFNGR1	0.734816	0
LEPR	0.733158	0
CLEC7A	0.732983	0
VIM	0.732674	1
KLRK1	0.732465	0
ADGRE5	0.732337	0
NCAM1	0.732053	1
SELPLG	0.731786	1
CTSL	0.73102	0
FOLR2	0.730826	0
CLDN4	0.730176	0
LAMP1	0.729608	1
IL6ST	0.729578	0
CD24	0.72885	0
LPL	0.728608	0
SLAMF6	0.728334	0
GPC1	0.728063	1
CSF2RB	0.72758	0
NCSTN	0.72686	0
DDR2	0.726048	0
DAG1	0.725273	1
IL6R	0.725241	0
ITM2B	0.725107	0
CADM1	0.724329	0
RHOC	0.724254	0
ANXA1	0.723305	1
ACVRL1	0.72305	0
ADAM15	0.722383	0
SEMA4D	0.72236	0
TLR2	0.722187	0
FZD6	0.722111	0
CD99L2	0.721683	0
TF	0.720249	0
PODXL	0.719046	0
JAG1	0.718469	0
CD28	0.71817	0
F2R	0.718084	0
FZD5	0.717998	0
LYVE1	0.717626	0
CCR2	0.715848	1
CD63	0.715728	1
ITGB8	0.715006	1
IL2RB	0.71493	0
IL3RA	0.714448	0
FGFR3	0.714382	0
CCR6	0.713528	0
GRN	0.712827	0
CTNND1	0.711116	0
AXL	0.711037	1
CSF1	0.710703	0
TGOLN2	0.710531	0
ITGA2B	0.710471	0
ITGA3	0.709671	1
TNFRSF1B	0.709558	0
JAM2	0.70942	0
ACVR2A	0.709185	0
SLC9A1	0.707895	1
TLN1	0.707661	0
CD53	0.707291	0
ERBB3	0.707051	0
IL10RB	0.706458	0
JAM3	0.706256	0
IFNGR2	0.706165	0
CSF2RA	0.705538	0
FLT1	0.705469	0
CNTNAP1	0.705189	0
CLTC	0.705111	0
SLC23A2	0.705026	0
CDH17	0.705009	0
WNT5A	0.704831	0
MSR1	0.704817	1
SORL1	0.704615	0
GAPDH	0.702374	0
NGFR	0.700905	1
CD7	0.700767	0
CD83	0.699942	0
C1QBP	0.698377	0
FCGR1A	0.697523	0
PLPP3	0.697185	0
EPHA3	0.696032	0
NOTCH1	0.695559	0
CIB1	0.694874	0
CLDN7	0.694833	0
EPCAM	0.693765	0
CD69	0.693543	0
SDC1	0.693531	1
LGR4	0.693249	0
ERBIN	0.69286	0
PARD3	0.692754	0
TFRC	0.692161	1
FZD1	0.691998	0
MPZL1	0.691361	0
TREM2	0.691152	0
HLA-DPB1	0.69091	0
LTBR	0.689544	0
ABCA1	0.688978	0
AGER	0.68847	0
LY6E	0.688067	0
PIP5K1A	0.688044	0
P2RX4	0.68801	0
HSP90AA1	0.687329	1
MSN	0.687313	0
HLA-C	0.686698	0
BMPR2	0.686407	0
ARF1	0.685995	0
HSPD1	0.68594	0
CNTN1	0.685715	0
ACTN4	0.684697	0
FYN	0.684652	0
TMED10	0.684274	0
MERTK	0.68379	1
PAK1	0.682396	0
HSPA8	0.681262	1
CD3D	0.681175	0
CD79A	0.680101	0
CD1D	0.679633	0
SCARB2	0.679478	1
ACTN1	0.679393	0
NOTCH3	0.676677	0
IL7R	0.676292	0
CD34	0.675448	0
CDH5	0.675409	0
CD93	0.674234	0
THY1	0.672753	1
CEACAM5	0.672012	1
KLRB1	0.671734	0
CD27	0.671356	0
MSLN	0.668925	0
ACTB	0.668551	0
NTRK1	0.667772	0
L1CAM	0.667551	0
IGSF8	0.667247	0
ICAM2	0.667202	0
ABCB1	0.666002	0
EZR	0.664226	0
VASP	0.664132	0
CYBB	0.663718	0
ENPP1	0.663708	0
ADRB2	0.662894	0
LILRB2	0.662555	0
CD200	0.661925	0
RAB8A	0.661878	0
PHB2	0.661501	0
ADGRE1	0.660908	0
CXCR5	0.66037	0
TLR1	0.660158	0
IL4R	0.659601	0
CD6	0.659352	0
PLXNB2	0.659085	0
TPBG	0.658676	0
PKD2	0.658083	0
TFPI	0.658082	0
CD300C	0.657692	0
ENO1	0.657598	0
RDX	0.657451	0
MYO1C	0.657355	0
HM13	0.657115	0
TNFRSF14	0.656747	1
PLXNC1	0.656115	0
ACVR1B	0.655842	0
ANOS1	0.65574	0
PTK7	0.655416	0
GJA1	0.65541	0
DLL4	0.653707	0
TNFRSF21	0.652758	0
APLP2	0.652163	0
ATP1B3	0.65216	0
SMPD1	0.652081	0
TIGIT	0.65194	0
FGFR1	0.651767	1
SLC40A1	0.651151	0
KLRG1	0.651068	0
IL10RA	0.649667	0
HLA-DRB5	0.649306	0
DSC2	0.64894	0
CR2	0.648185	1
SNAP23	0.647819	0
GPC3	0.646015	0
CD8A	0.645827	0
SEMA7A	0.645685	0
TCIRG1	0.645634	0
DDR1	0.645074	0
MPZL3	0.644904	0
RGMB	0.644889	0
LAG3	0.64472	0
GHR	0.644711	0
MCOLN1	0.644301	0
APLP1	0.644279	0
STIM1	0.644235	0
PDCD1	0.641693	0
SNX9	0.640791	0
HLA-F	0.639892	0
PTPRF	0.63985	0
STAMBP	0.639503	0
IL1RL1	0.639118	0
FCGRT	0.637674	1
CXCR2	0.637478	0
LMAN2	0.637074	0
AGRN	0.636861	0
FLNA	0.63567	0
IL11RA	0.6352	0
GYPC	0.634981	0
VDAC1	0.633835	0
EXTL3	0.63284	0
ICOSLG	0.632077	0
EEF1A1	0.631908	0
GPC4	0.631876	0
CD40LG	0.631228	0
MUC1	0.630863	0
GP1BB	0.630764	0
FZD7	0.630711	0
PRF1	0.629264	0
GNAI2	0.628439	0
TNFSF13B	0.628339	0
CCR4	0.628213	0
KDR	0.627585	0
PRKCA	0.627518	0
CXCL16	0.62747	0
FGFR2	0.626789	1
STX4	0.625849	0
FPR2	0.625756	0
LPAR6	0.624933	0
FCER1A	0.624546	0
CD1C	0.624002	0
FZD2	0.623648	0
RAB5C	0.623512	0
EPHB2	0.623181	0
MMP14	0.622791	0
S100A9	0.622645	0
HYAL2	0.62264	1
PROCR	0.622532	0
FPR1	0.621513	0
CDIPT	0.621426	0
CXCR1	0.61993	0
TMEM30A	0.619502	0
CEACAM8	0.619452	0
ATRAID	0.618294	0
UTRN	0.617887	0
SEMA6A	0.617608	0
CR1	0.616083	1
CD3G	0.616008	0
ITGA8	0.615968	0
SELE	0.615633	0
SPN	0.615581	0
CLEC4A	0.61482	0
ADAM23	0.614153	0
IL15RA	0.613382	0
ADAM22	0.613367	0
TGFBR3	0.612343	0
CD38	0.612136	0
ALPL	0.611779	0
SLAMF7	0.611406	0
ESAM	0.610356	0
SIGLEC10	0.609894	1
CADM3	0.60977	0
SLC38A2	0.609731	0
BMPR1A	0.608824	0
CD5	0.608542	1
YBX1	0.608541	0
LPAR2	0.607337	0
LRP6	0.606733	0
P2RX1	0.606707	0
CDH11	0.606405	0
IL1R2	0.605088	0
SIGLEC12	0.604662	0
SGCB	0.603854	0
SLC2A3	0.603846	0
SLC1A3	0.603526	0
HFE	0.601854	0
IL2RA	0.600842	0
IGF1R	0.600242	1
TLR6	0.599245	0
ACVR1	0.598678	0
PTPRA	0.598464	0
EFNA4	0.597634	0
ADD1	0.597209	0
ITGA1	0.597137	1
LRP10	0.596972	0
IL17RC	0.59623	0
LTF	0.595838	0
TNFRSF18	0.595813	0
TJP1	0.59427	0
GGT1	0.594175	0
CD8B	0.593776	0
TLR3	0.593634	0
OPCML	0.593212	0
CP	0.593188	0
OGT	0.592954	0
LY9	0.592252	1
TNF	0.592165	0
CEACAM6	0.592047	1
TTYH3	0.591952	0
PI4KA	0.591615	0
RAMP3	0.590848	0
PSEN2	0.590086	0
PSEN1	0.590061	0
VIPR1	0.589242	0
BCHE	0.589212	0
LRP8	0.588961	1
CLDN3	0.58855	0
KLRD1	0.587686	0
FLOT1	0.587455	0
MS4A6A	0.587345	0
FAP	0.586595	0
HSPA13	0.58418	0
IL21R	0.58341	0
BACE2	0.583135	0
STEAP3	0.582558	0
OLR1	0.582458	0
ENTPD3	0.582114	0
SEMA4A	0.58085	0
HS6ST1	0.580582	0
CTSG	0.579815	0
ASPH	0.578766	0
PDCD1LG2	0.578437	0
SLC3A2	0.578199	1
P2RX7	0.578161	0
GABBR1	0.577069	0
SLC11A2	0.576771	1
ATP6AP1	0.576505	0
GJB2	0.576166	0
RAB13	0.576054	0
ATP6V0A2	0.575983	0
LIFR	0.575828	0
KCNQ1	0.575502	0
ADAM19	0.57547	0
ECE1	0.575382	0
EREG	0.574493	0
PTCH1	0.574111	0
BTN3A2	0.572724	0
SLC19A2	0.571973	1
FGA	0.57151	0
KCNE3	0.571169	0
STAB2	0.568462	0
MICA	0.568104	0
IL17RA	0.568037	0
SLC9A3	0.567231	1
ADCY6	0.567202	0
ADORA2A	0.566122	0
CASR	0.565946	0
DLL1	0.565585	0
TNFRSF4	0.565462	1
FLT4	0.565362	0
SIGLEC6	0.565205	0
TREM1	0.564726	0
SEMA4G	0.564571	0
ADGRG1	0.564199	0
P2RY12	0.56408	0
LRIG1	0.563114	0
ADGRE2	0.563039	0
NTRK2	0.562748	0
ANTXR2	0.562227	0
KCNA3	0.561821	0
PLXNB3	0.561744	0
TSPAN14	0.561266	0
RTN4	0.561008	0
CLN3	0.560703	0
SLC31A1	0.560463	0
NRG1	0.560462	0
CLDN1	0.560422	1
ASGR1	0.55984	1
TLR7	0.559807	0
RECK	0.559692	0
SLC16A1	0.559409	0
FLT3	0.558972	0
ANK3	0.55885	0
FZD3	0.55879	0
SPINT1	0.558336	0
LIMA1	0.55833	0
TRPV2	0.557635	0
SLC12A4	0.557534	0
SCRIB	0.557523	0
HLA-DQB1	0.557445	0
CD164	0.557399	1
AQP1	0.557286	0
PDGFC	0.557166	0
MYLK	0.557076	0
LNPEP	0.556722	0
CLEC12A	0.556621	0
SLC30A1	0.55643	0
SMO	0.556168	0
LAMTOR1	0.556149	0
ANTXR1	0.555729	1
FCGR3B	0.555007	0
EDNRB	0.55475	0
CYBA	0.554483	0
SYK	0.554197	0
CANT1	0.554045	0
HHIP	0.552161	0
TNFRSF11B	0.552158	0
TNFRSF9	0.551591	0
PROM1	0.551354	0
TSPAN31	0.551195	0
LRRC8A	0.550316	0
PTPRU	0.550189	0
CA4	0.549767	0
CNTN2	0.549621	0
KCNMA1	0.548765	0
ANGPT1	0.548696	0
IFITM1	0.548508	0
S1PR2	0.5484	0
PACSIN2	0.548386	0
ADGRB1	0.548323	0
CD300LF	0.54805	1
RYK	0.547884	0
ITSN1	0.547883	0
SLC6A1	0.547638	0
ADIPOR1	0.546142	0
ABCG2	0.545382	0
SLC33A1	0.545271	0
IFNLR1	0.54489	0
TNFRSF10D	0.544341	0
CLDN5	0.54363	0
SLC1A1	0.542249	0
P2RY1	0.541912	0
EPHB1	0.541737	0
CD52	0.540954	0
SLC1A5	0.540754	1
NEGR1	0.540652	0
STOM	0.540611	0
SPHK1	0.539624	0
ICOS	0.539551	0
GAB2	0.539236	0
MPZL2	0.538736	0
ATP1A1	0.538085	0
CDH13	0.536871	0
UNC5B	0.535915	0
GGT7	0.535049	0
ITGA11	0.534526	0
SLC9A9	0.534474	0
TMPRSS2	0.534425	1
VAMP5	0.534393	0
TJP2	0.534275	0
NTRK3	0.534109	0
MST1R	0.533308	0
C4BPA	0.533006	0
KLRC2	0.532847	0
SLC39A1	0.532836	0
SIGLEC1	0.532784	1
F2	0.532258	0
VLDLR	0.532122	1
BAMBI	0.531971	0
ROR2	0.531461	0
XCR1	0.531436	0
CD244	0.530751	0
TNFRSF13B	0.529476	0
CCRL2	0.529351	1
PRSS8	0.528872	0
CHL1	0.528624	0
EFNA5	0.528609	1
DSP	0.528046	0
IL18RAP	0.527829	0
NECTIN3	0.527385	0
CD82	0.526868	0
TMX3	0.526816	0
CLMP	0.526812	0
EPOR	0.525858	0
SLC29A1	0.52351	0
PDPN	0.523183	0
ADIPOR2	0.522114	0
SLC2A4	0.521124	0
PIK3CG	0.520877	0
JAG2	0.520653	0
PLSCR1	0.520474	1
ROR1	0.519869	0
LILRB3	0.519637	0
ADGRG6	0.519447	0
ADCY7	0.518676	0
CCR3	0.518496	1
PTPRJ	0.518484	0
ITPR1	0.517301	0
IL1RAP	0.517078	0
S1PR4	0.51707	0
GAA	0.516086	0
PKD2L1	0.515567	0
PTPRS	0.515272	0
CD200R1	0.515031	0
GP6	0.51481	0
TNFRSF10C	0.514244	0
ANO1	0.514046	0
OCLN	0.513484	1
MTM1	0.513041	0
SLC6A4	0.512692	0
SIGLEC8	0.512582	0
FGR	0.512551	0
EHD1	0.512289	0
KLRC1	0.511942	0
CXCR6	0.511918	1
LSAMP	0.511756	0
FASLG	0.51167	0
MPL	0.511413	0
NCR3	0.511408	0
EPB41L2	0.511297	0
GIPR	0.51092	0
PTGER4	0.510201	0
PKD1	0.510183	0
FGB	0.509641	0
IL18R1	0.509545	0
TYRO3	0.509114	1
SLC46A1	0.508682	0
MS4A1	0.505868	0
ADAM8	0.505497	0
FGFR4	0.50477	0
PLXND1	0.504424	0
CD177	0.502777	0
CNR1	0.502737	0
MAGT1	0.502577	0
SLC5A6	0.501617	0
CXADR	0.501492	1
SLC39A14	0.501205	0
CDHR5	0.500647	0
SPPL2A	0.499897	0
RND1	0.499684	0
NCR2	0.499467	0
SLC2A1	0.499097	1
ABCG1	0.498817	0
OSMR	0.498441	0
OPN3	0.497626	0
ARAP1	0.496107	0
MARK2	0.495875	0
TCHP	0.495467	0
PTPRB	0.495395	0
ATRN	0.495358	0
NCKAP1L	0.494786	0
PLXNB1	0.494409	0
SLC3A1	0.494136	0
FGF10	0.494057	0
IFITM3	0.493378	0
TSPAN33	0.493318	0
EXOC1	0.493206	0
EPHB6	0.492444	0
HLA-DPA1	0.492142	0
ANPEP	0.491734	1
CDH3	0.491025	0
FZD8	0.49086	0
RAMP2	0.490422	0
LY75	0.490118	0
PIGR	0.489987	0
PARD6A	0.489451	0
SLC31A2	0.48936	0
ATP6V0A1	0.489332	0
NPHS1	0.489322	0
TMPRSS6	0.489135	0
SCN4B	0.489054	0
TLR8	0.488676	0
CAPNS1	0.488644	0
EPB41L3	0.488056	0
SLC4A7	0.487479	0
CD3E	0.487158	0
SLC12A2	0.486097	0
HAVCR1	0.485985	1
SLC15A2	0.485478	0
ABCC1	0.485255	0
TLR5	0.485072	0
WNT5B	0.484542	0
MELTF	0.483943	0
RGMA	0.483906	0
PLPP1	0.483544	0
LSP1	0.48286	0
NOTCH4	0.482755	0
NFASC	0.482445	0
NF2	0.482378	0
SLC7A1	0.481259	1
STS	0.480864	0
AQP3	0.480643	0
NCR1	0.48059	0
TM4SF1	0.480342	0
CD300LB	0.479902	0
TNFSF11	0.479575	0
CLEC1B	0.479146	0
FCER2	0.47901	0
KANK1	0.478872	0
SVIL	0.477739	0
ADAM28	0.477516	0
PLXNA2	0.477303	0
AOC1	0.476284	0
SIRPG	0.476057	0
ATP2B4	0.475709	0
SLC39A9	0.475614	0
TSPAN4	0.474903	0
ACKR1	0.47487	0
PMP22	0.474411	0
IL27RA	0.474126	0
SLC1A2	0.473608	0
ATP2B1	0.473216	0
BTLA	0.472386	0
ADGRA2	0.472384	0
PLXNA3	0.471757	0
LRPAP1	0.471741	0
CYTH2	0.471628	0
RAMP1	0.470917	0
GPA33	0.470604	0
CD96	0.470049	0
SEMA6B	0.469924	0
MMGT1	0.469754	0
TRAC	0.469187	0
MACF1	0.468672	0
ADORA2B	0.467357	0
SLC22A3	0.466523	0
PANX1	0.466438	0
CLEC2B	0.466033	0
C5AR1	0.464833	0
CPD	0.464439	0
SCNN1A	0.464308	0
NPC1	0.464259	1
TSPAN15	0.463941	0
P2RY13	0.46359	0
EPHB3	0.462939	0
ARL4C	0.462626	0
EPGN	0.46262	0
SIRPB1	0.462261	0
KREMEN1	0.462012	1
YIPF3	0.462003	0
KCNH2	0.461953	0
PDE4A	0.461485	0
TIMD4	0.460446	1
CLPTM1	0.459537	0
KCNC1	0.459517	0
KNG1	0.459493	0
PACSIN3	0.458665	0
PKP2	0.457191	0
SLC8A1	0.457105	0
SLC5A1	0.456884	0
EHD3	0.456693	0
ZDHHC5	0.45669	0
PTPRT	0.456432	0
TRAT1	0.455831	0
KCNJ2	0.455444	0
CLDN11	0.455437	0
SLC29A3	0.455363	0
GJA4	0.455274	0
TRPC6	0.454846	0
SLC2A13	0.454681	0
TMEM219	0.45462	0
DUOX1	0.454455	0
EHD2	0.454243	0
SPPL3	0.454205	0
GRK5	0.454136	0
CPM	0.453924	0
IZUMO1	0.453685	0
TNFSF8	0.45319	0
ABCB4	0.452992	0
SIGIRR	0.452673	0
F5	0.451351	0
ABCC2	0.450141	0
KIRREL2	0.450055	0
GGT5	0.449569	0
RTN4R	0.448506	1
SULF2	0.448364	0
TSPAN7	0.448295	0
PSENEN	0.448269	0
KCNN4	0.447432	0
GPIHBP1	0.447341	0
EVI2B	0.447175	0
FCHSD2	0.447075	0
LRP12	0.446838	0
TSPAN2	0.446754	0
GPER1	0.446682	0
ITGAE	0.446427	0
SUSD3	0.44637	0
SLC22A5	0.446227	0
GPC6	0.445601	0
RAB23	0.445474	0
SLC22A18	0.445092	0
SLC39A6	0.445037	0
KIRREL1	0.444963	0
ROBO2	0.444947	0
PTAFR	0.444476	0
CLDN15	0.444175	0
LRP2	0.44359	0
MC1R	0.44353	0
TULP3	0.443405	0
CERCAM	0.443009	0
PILRA	0.442886	1
SKAP1	0.442674	0
TIE1	0.441693	0
SLC16A3	0.441296	0
EMP1	0.439725	0
TNFRSF25	0.439641	0
CHRNB1	0.439362	0
SCARF1	0.439286	0
GOLM1	0.43864	0
NPR2	0.438388	0
SLC36A1	0.438369	0
TTYH2	0.437851	0
EFNA3	0.43775	0
TLR10	0.437543	0
ATP1B2	0.437402	0
FFAR2	0.437385	1
SLC4A4	0.437216	0
SLC39A8	0.43705	0
AMIGO2	0.437023	0
SLC38A1	0.436914	0
SERINC1	0.436864	0
SLC7A5	0.436703	0
HLA-G	0.436552	0
CDH15	0.436134	0
NTM	0.436064	0
P2RY2	0.43565	0
CALCRL	0.434979	0
ADRA2A	0.434516	0
ADCY4	0.434465	0
MMP15	0.434327	0
PLPP2	0.432826	0
UNC5C	0.432735	0
EGF	0.432713	0
CD320	0.432398	0
SLCO2B1	0.431692	0
ADGRL1	0.431649	0
HLA-DOA	0.431491	0
SLC7A7	0.431104	0
LAT	0.431084	0
MYOF	0.430946	0
ERBB4	0.429627	0
CRIM1	0.429484	0
IL20RB	0.429452	0
TLR9	0.429057	0
NTNG2	0.428871	0
KCNK1	0.428744	0
LGR5	0.428073	0
CLEC2D	0.427835	0
SPINT2	0.427728	0
IL5RA	0.427293	0
ITPR3	0.426964	0
MR1	0.425454	0
SCN3B	0.425246	0
PAG1	0.425237	0
TNFRSF19	0.42515	0
CMKLR1	0.424942	0
LMBRD1	0.424811	0
LTB	0.424282	0
CAVIN1	0.424268	0
CNNM4	0.424242	0
EFR3A	0.424103	0
PTPRM	0.424009	0
MARCO	0.423932	1
BTC	0.423687	0
ADCY3	0.423566	0
IGHG1	0.4233	0
MUC20	0.423228	0
CSPG4	0.422583	0
SLC23A1	0.422475	0
FPR3	0.422058	0
AKAP11	0.419975	0
APLNR	0.419757	1
C4A	0.419158	0
DUOX2	0.418681	0
DYSF	0.418392	0
LILRB1	0.417711	0
C3AR1	0.416806	0
GPRC5A	0.416034	0
ICAM5	0.41591	1
PCDH18	0.415627	0
KCND3	0.414905	0
FCRL2	0.414885	0
GP2	0.414664	0
S1PR3	0.414382	0
LIPH	0.413936	0
NLGN4X	0.413774	0
TNFRSF11A	0.413677	0
CCR10	0.413548	0
IGHG2	0.413054	0
KCNC4	0.412538	0
MARCKS	0.412327	0
LRIG3	0.411958	0
SLC18A2	0.411558	0
IL12RB1	0.411318	0
MPZ	0.4113	0
CGN	0.411104	0
ACKR2	0.410689	1
CACNA1H	0.410666	0
ITM2C	0.409968	0
CHRNA4	0.408664	0
SLC9A6	0.40835	0
VASN	0.40828	0
VSIG2	0.408255	0
EMP3	0.408211	0
PTH1R	0.408056	0
LY6D	0.408021	0
SGCE	0.407757	0
NOX4	0.407582	0
VNN2	0.407192	0
LRRC32	0.406998	0
CRB1	0.406756	0
PRLR	0.406017	0
ACKR4	0.405853	0
CLDN23	0.405687	0
PMEL	0.405358	0
STX1A	0.404412	0
APOB	0.404174	0
KCNQ5	0.403047	0
SGMS2	0.402724	0
CYSLTR2	0.402701	0
PARD6G	0.402612	0
ENPP4	0.401903	0
PIEZO1	0.401566	0
KLRF1	0.400664	0
EMB	0.400561	0
FZD10	0.400087	0
ROBO4	0.399987	0
ATP4B	0.399488	0
BTN3A1	0.39903	0
TBXA2R	0.39885	0
SLC36A4	0.398749	0
RNF43	0.398585	0
TMEM25	0.398552	0
ABCC9	0.398508	0
AQP9	0.398405	0
AMN	0.398224	0
PLP1	0.397845	0
CDON	0.397845	0
TRPV4	0.397243	0
NLGN2	0.397069	0
ADGRF5	0.39703	0
HAS2	0.396854	0
GPR183	0.396736	0
CHRM1	0.396658	0
SEMA6D	0.39648	0
ASIC1	0.396472	0
HGSNAT	0.396043	0
ORAI3	0.395667	0
TNFRSF17	0.395545	0
CD302	0.395193	0
SLC9B2	0.394221	0
SEMA6C	0.394051	0
RHBDF2	0.394012	0
CCR9	0.394008	0
TNFRSF8	0.39372	0
GRIN2C	0.393093	0
ABCG5	0.392168	0
ADCY9	0.392079	0
KCNA5	0.391747	0
TDGF1	0.390762	0
GPBAR1	0.390685	0
FLRT2	0.390675	0
FOLH1	0.39042	0
GLIPR1	0.390378	0
PLP2	0.389744	0
ENTPD2	0.389391	0
SLC2A5	0.389079	0
SSH1	0.388911	0
SLC22A4	0.388817	0
NPC1L1	0.388634	0
MFSD5	0.388506	0
TSPAN13	0.388235	0
PIK3IP1	0.387959	0
LRRC4	0.387957	0
SCARA5	0.386824	0
SPPL2B	0.386747	0
LSR	0.386282	0
IL13RA2	0.386227	0
NRG4	0.386105	0
RELL1	0.386024	0
ASGR2	0.385394	0
ADCYAP1R1	0.385257	0
PCDHGC3	0.385206	0
ZP3	0.384322	0
QSOX2	0.384223	0
FLVCR1	0.384043	1
ADAM32	0.38388	0
TM2D1	0.383796	0
CLCN5	0.383719	0
GLP1R	0.382727	0
IGKV1D-39	0.38267	0
CD1B	0.382556	0
MUSK	0.382284	0
IGLV1-51	0.381844	0
SERINC3	0.381669	0
LINGO1	0.381497	0
SLC47A1	0.380069	0
CD160	0.379467	0
GPR137B	0.37919	0
EDNRA	0.378989	0
PTPRG	0.378858	0
COLEC12	0.378656	0
NRXN1	0.378655	0
SLC41A2	0.378339	0
IGHM	0.377812	0
SLC6A12	0.377764	0
KIRREL3	0.377314	0
ACVR2B	0.376765	0
CNNM3	0.376331	0
BEST1	0.376211	0
CACNA2D1	0.376041	0
GRM5	0.375944	0
TNFSF15	0.375678	0
GJA5	0.375548	0
SLC26A6	0.375438	0
BTN2A2	0.375295	0
SLC2A8	0.375228	0
GPM6A	0.374805	0
SLCO4A1	0.3747	0
NECTIN4	0.374606	1
OMG	0.374563	0
FGFRL1	0.374554	0
C11orf24	0.374478	0
FLRT3	0.374348	0
GPRC5B	0.374321	0
RAB25	0.374235	0
EFNA2	0.374161	1
CNTFR	0.373906	0
SERPINB2	0.373688	0
SLC6A6	0.373368	0
PTGER2	0.372889	0
MGAM	0.372773	0
PALS1	0.372682	0
DLG2	0.372501	0
NHERF2	0.372281	0
SLC1A4	0.371614	0
ANK2	0.371354	0
MUC16	0.371201	0
PSCA	0.371085	0
CLDN2	0.370867	0
SLC38A6	0.370776	0
MAG	0.370731	1
HAS1	0.370395	0
CD1A	0.370393	0
PACC1	0.369876	0
NCS1	0.369434	0
TPRA1	0.369398	0
ACE2	0.369302	1
SCNN1D	0.369067	0
GPR161	0.368706	0
GABRA2	0.368614	0
LILRA1	0.368133	0
CD84	0.368095	0
ENPP3	0.367436	0
CRHR2	0.367435	0
MFSD6	0.367109	0
RNF167	0.366545	0
GUCY2C	0.366477	0
TSHR	0.366447	0
MILR1	0.366264	0
LILRA5	0.36607	0
SLC20A1	0.36597	1
TNFSF4	0.365827	0
KIAA0319L	0.365706	1
TNFSF12	0.365637	0
CD248	0.365544	0
ABCC5	0.365292	0
ATP11C	0.365279	0
SERPINA5	0.365088	0
TSPAN9	0.364668	1
KCNV2	0.364508	0
CD19	0.363861	0
CFTR	0.363826	0
ABCC4	0.36365	0
SLC9A7	0.363531	0
MYADM	0.363523	0
PILRB	0.363474	0
ITFG1	0.363386	0
GRM2	0.363318	1
VSTM4	0.363285	0
ULBP2	0.362996	0
SCN8A	0.362134	0
BMPR1B	0.361839	0
NTNG1	0.361807	0
DCBLD2	0.361672	0
RHOJ	0.361391	0
RP2	0.360097	0
EPHA1	0.359677	0
CEMIP2	0.359017	0
CACNA1D	0.358985	0
GRIN2D	0.358846	0
KEL	0.358289	0
LAIR1	0.358093	0
GABRG2	0.358037	0
COL17A1	0.357559	0
GFRA1	0.357347	0
GDPD5	0.357111	0
SMAGP	0.356978	0
ENPEP	0.356216	0
SLC26A2	0.355954	0
ADGRV1	0.355576	0
TMEM150A	0.355426	0
ADGRA3	0.355356	0
P2RY8	0.355106	0
ACE	0.355035	0
ADGRL4	0.354423	0
SLC7A6	0.354173	0
PTPRN	0.354146	0
CRB3	0.354035	0
GPR85	0.353803	0
TRPM4	0.353541	0
APBB1	0.353366	0
SLC11A1	0.352857	0
MICB	0.35101	0
KL	0.351008	0
TMEM123	0.350855	0
SCUBE3	0.350349	0
ADAM2	0.350173	0
PHEX	0.349939	0
TJP3	0.349682	0
SECTM1	0.349592	0
CDH4	0.348949	0
SIGLEC11	0.3488	0
ST14	0.348681	0
NPDC1	0.348309	0
GPR160	0.347935	0
FREM2	0.347721	0
SLC6A3	0.347715	0
BASP1	0.347633	0
SCN2B	0.347472	0
SIGLEC14	0.347389	0
RELT	0.347292	0
SLC43A1	0.347263	0
LRFN4	0.347006	0
GAS1	0.346358	0
CLDN18	0.34632	0
SLC20A2	0.346191	1
MFSD2A	0.346106	0
SLC7A8	0.346068	0
IL20RA	0.34592	0
GPR174	0.345879	0
NLGN3	0.344965	0
CACNG2	0.344779	0
TM9SF2	0.344476	0
HTR3A	0.344404	0
ADRA2B	0.344106	0
XPNPEP2	0.344051	0
KCNE1	0.343336	0
TMEM87A	0.343227	0
LPAR5	0.343175	0
GRIN1	0.342579	0
SLC39A10	0.342225	0
STEAP4	0.342224	0
NRXN2	0.342182	0
SLC2A9	0.342128	0
SCN5A	0.341724	0
SLC43A2	0.341183	0
SLC15A4	0.341092	0
GRM6	0.340655	0
CHRM2	0.340516	0
GRIN2A	0.340502	0
ITPRIP	0.340238	0
GPR162	0.340179	0
SLC27A1	0.340178	0
THSD7A	0.339803	0
LY6H	0.339788	0
KCNMB1	0.339678	0
TM2D3	0.338869	0
MUC13	0.338345	0
CSPG5	0.338067	0
SYPL1	0.337742	0
TTC7B	0.3377	0
ADRB1	0.337571	0
GPC2	0.337439	0
SSPN	0.337101	0
PTGDR	0.336805	0
CD70	0.33537	0
CLDN12	0.335262	0
ERVW-1	0.334018	0
TFR2	0.33397	0
TPO	0.333529	0
CLDN10	0.333005	0
ULBP1	0.332931	0
GFRA3	0.332872	0
MOG	0.332502	1
CUBN	0.331836	0
TMEM8B	0.33174	0
PIGN	0.331544	0
MMD	0.331462	0
GPR34	0.331382	0
LRP1B	0.331301	0
KCNA1	0.331223	0
GHRHR	0.331141	0
ADRA1A	0.330919	0
TSPAN5	0.330135	0
SGCD	0.330068	0
HLA-DQA2	0.32989	0
NRXN3	0.32961	0
GABRG1	0.329508	0
ADCY5	0.329462	0
KCNC3	0.329427	0
SLC51A	0.329138	0
TMEM204	0.329105	0
SLCO3A1	0.329025	0
BST1	0.328865	0
NEU1	0.328523	0
ATP7A	0.328309	0
PCDH15	0.328203	0
ERMAP	0.328155	0
EFNB3	0.328124	1
NRCAM	0.328106	0
KIR3DL1	0.32808	0
SYTL2	0.327887	0
CLEC1A	0.327485	0
NPY1R	0.327273	0
TNFRSF13C	0.327157	0
NKTR	0.32688	0
MUC15	0.326854	0
CRHR1	0.326372	0
GRIA1	0.325949	0
SCNN1G	0.325701	0
TREML2	0.325449	0
F2RL1	0.325293	0
CHRM3	0.325115	0
GP5	0.32474	0
KCNE5	0.32354	0
CACNA2D2	0.323379	0
SLC29A2	0.323045	0
AVPR2	0.322458	0
PLXNA1	0.322226	0
CD300E	0.322164	0
BTN3A3	0.321286	0
GPR107	0.321227	0
TMEM63B	0.321211	0
B3GNT3	0.319989	0
BTN2A1	0.319811	0
CLDN20	0.319792	0
KIR3DL2	0.319766	0
ABCB6	0.319754	0
GLG1	0.319499	0
SULF1	0.31894	0
DSCAM	0.318579	0
LTB4R	0.317258	0
KCNE2	0.31713	0
TTC17	0.317111	0
TMEM179B	0.316779	0
NPR3	0.316614	0
CD300LG	0.31653	0
CLDN16	0.316311	0
KCNS3	0.316287	0
CEACAM4	0.315861	0
TMEM63A	0.315733	0
RET	0.315278	0
ABCC3	0.315016	0
PMEPA1	0.314666	0
AGTR2	0.314532	0
CTNS	0.314454	0
PGAP6	0.313537	0
GPM6B	0.312516	0
CDCP1	0.312489	0
SLC19A3	0.31234	0
CACNA1I	0.31224	0
SLC17A5	0.312088	0
HTR2A	0.311492	1
DSC3	0.31138	0
FSHR	0.310629	0
MCEMP1	0.310077	0
KCNK5	0.310046	0
TREML1	0.309893	0
ATP1A3	0.309794	0
SLC22A1	0.309009	0
ACP3	0.308668	0
SCUBE1	0.308379	0
FLVCR2	0.30769	1
DYNC2H1	0.307373	0
F2RL2	0.307275	0
DNER	0.307222	0
PTPRD	0.306771	0
KCNJ15	0.306719	0
CEACAM3	0.306687	0
PON2	0.306594	0
P2RY14	0.306523	0
SLC16A10	0.306219	0
SLC16A9	0.306052	0
SLC2A2	0.3058	0
CRB2	0.305421	0
SLC10A1	0.305139	1
ITGA10	0.304987	0
EDA	0.304511	0
SLC41A1	0.3045	0
ATP10D	0.303855	0
CAV3	0.303452	0
RHO	0.30319	0
SLC5A3	0.302953	0
CELSR1	0.302926	0
GRIN3A	0.30289	0
OPRM1	0.302818	0
SLC10A2	0.302216	0
CHRNA7	0.301997	0
SLC16A7	0.301972	0
ADD3	0.301775	0
ABCA7	0.301562	0
PCDH1	0.301541	1
LRP11	0.301271	0
GRM3	0.300959	0
CD180	0.300831	0
LDLRAD3	0.30064	1
CHRNA5	0.300622	0
KIR2DL3	0.300351	0
SLC6A8	0.300003	0
ABCB11	0.299164	0
ULBP3	0.299159	0
SMPDL3B	0.299128	0
RHAG	0.298668	0
KCNQ3	0.29857	0
SLC7A2	0.298522	0
DRD4	0.29832	0
DRD2	0.298217	0
ZP2	0.298164	0
SLC26A11	0.297926	0
AMER1	0.297692	0
BDKRB2	0.297684	0
SLC8B1	0.297656	0
ADAP1	0.297597	0
SSTR2	0.297176	0
MAPT	0.296926	0
LPAR3	0.296423	0
MMP25	0.296337	0
ZDHHC4	0.296056	0
IGHG4	0.295856	0
TRPM8	0.295726	0
PCDH7	0.295519	0
BVES	0.295413	0
HTR1A	0.295306	0
SSTR3	0.29515	0
RASGRP1	0.295057	0
SLC38A4	0.294965	0
CACNA1C	0.294807	1
LRP4	0.294655	0
TNFSF14	0.294377	0
TRDN	0.294348	0
CELSR3	0.294255	0
EPS8L2	0.294047	0
KCNJ4	0.294013	0
GLRB	0.293577	0
TACR1	0.293573	0
TRPC4	0.293016	0
VSIR	0.292644	0
IGHA1	0.292016	0
SLC12A7	0.29148	0
TM7SF3	0.291314	0
AMOT	0.291174	0
ENPP6	0.291091	0
KIR2DL1	0.291072	0
BOC	0.291062	0
ATP7B	0.290611	0
SPAM1	0.290537	0
HPN	0.290396	0
AQP5	0.290267	0
HTR2B	0.289841	0
CRTAM	0.289781	0
SLC4A2	0.28969	0
SLC18A3	0.289677	0
SV2A	0.28962	0
NOX1	0.289419	0
CACNA1S	0.289337	0
GRM1	0.289135	0
MFAP3	0.289126	0
HTR2C	0.288171	0
LRP3	0.288003	0
AQP4	0.287812	0
TMEM30B	0.287316	0
P2RY6	0.287139	0
CLDN17	0.286987	0
TMEM97	0.286053	0
ATP2B2	0.286033	0
CORIN	0.285929	0
PCDH19	0.285808	0
GYPA	0.285716	1
SLC34A1	0.285509	0
FZD9	0.28531	0
JAML	0.28524	0
SCN4A	0.285074	0
LRRC8C	0.285041	0
IGSF6	0.284665	0
SLC2A10	0.284649	0
GRAMD1A	0.284108	0
DRD3	0.28371	0
C4BPB	0.283653	0
ANKH	0.283214	0
LRRC8B	0.282476	0
SLC16A4	0.282469	0
TMEM131L	0.282451	0
GRM8	0.282282	0
ATP1A2	0.28215	0
TSPAN1	0.281784	0
GRID2	0.281712	0
ALPP	0.281693	0
SERINC5	0.281064	0
SCNN1B	0.280716	0
IL1RAPL1	0.280508	0
FLRT1	0.279747	0
SLC12A9	0.279208	0
KCNJ6	0.278958	0
SIRPB2	0.278411	0
SLCO2A1	0.27834	0
MEP1B	0.278289	0
TNFSF18	0.277927	0
ICAM4	0.277715	0
GPR39	0.277706	0
GPR37	0.277317	0
HEPH	0.277286	0
GPR3	0.276918	0
ROS1	0.276664	0
TRBV7-9	0.276604	0
SLC44A1	0.27589	0
SLC16A6	0.275631	0
ADRA2C	0.275393	0
C6orf89	0.274696	0
IL17RB	0.274662	0
LHFPL5	0.274097	0
LAMP3	0.273914	0
SPACA4	0.273745	0
GAP43	0.273226	0
GRIN2B	0.273168	0
PRRT2	0.273089	0
ALK	0.272601	0
HTR1B	0.272549	0
FAT4	0.27223	0
KCNK6	0.271898	0
RTN4RL2	0.271674	0
EPHA8	0.271566	0
HEG1	0.271317	0
EDA2R	0.271164	0
IGKV5-2	0.271109	0
PTGIR	0.2709	0
CNTNAP3	0.27052	0
NRROS	0.270505	0
CACNG1	0.270482	0
SLC26A1	0.270423	0
TSPAN12	0.269982	0
PCDHA4	0.269851	0
EDAR	0.269548	0
SLC16A5	0.26945	0
LRRC8E	0.269434	0
HHLA2	0.269157	0
SUSD2	0.268892	0
GABRA3	0.268216	0
GPR176	0.267707	0
VIPR2	0.267107	0
PTGER3	0.26699	0
THSD7B	0.266485	0
CLEC17A	0.266262	0
SLC12A6	0.266207	0
SLC22A23	0.265911	0
CNTN6	0.26574	0
IL22RA1	0.265208	0
TP53I13	0.264902	0
P2RX2	0.264728	0
DRD1	0.264661	0
CLEC14A	0.264644	0
MMP17	0.26439	0
KCNS1	0.264172	0
AMHR2	0.263816	0
CDHR2	0.263737	0
APCDD1	0.263683	0
FCRL6	0.263538	0
CADM2	0.263262	0
GABBR2	0.262903	0
P2RY10	0.262809	0
CHRNA3	0.262591	0
CA9	0.26248	0
PCDH12	0.262461	0
LTK	0.262193	0
CALCR	0.262173	0
SLC12A3	0.261944	0
PLA2R1	0.2612	0
SLC22A7	0.260701	0
VNN1	0.260646	0
KISS1R	0.260217	0
PCDHB14	0.259654	0
INSRR	0.259521	0
CCR8	0.259442	1
CDH8	0.258735	0
LILRA4	0.258469	0
CYSLTR1	0.258392	0
OPN1SW	0.258073	0
GPC5	0.257844	1
TMEM119	0.2576	0
ATP2B3	0.257071	0
SLC26A4	0.256937	0
SLC12A5	0.256924	0
ROBO3	0.256816	0
SLC6A14	0.256722	0
DCC	0.256696	0
GABRD	0.256062	0
KCNJ10	0.256056	0
DSG3	0.256011	0
MC4R	0.255978	0
NCEH1	0.255901	0
FCAR	0.255608	0
PLA2G3	0.255384	0
ASIC3	0.255331	0
CNTN4	0.25518	0
SCN9A	0.254831	0
LMBR1L	0.254045	0
BTNL9	0.253437	0
ADRA1B	0.253328	0
AVPR1A	0.25323	0
SLC6A2	0.253066	0
HLA-DQB2	0.25266	0
IGFLR1	0.252582	0
NPR1	0.25257	0
NOS1	0.252026	0
S1PR5	0.251854	0
GJC1	0.251817	0
CLDN9	0.250975	1
KCNQ4	0.250839	0
IZUMO1R	0.250136	0
PCDH10	0.249882	0
TRAV19	0.249726	0
GPR68	0.249045	0
TRPA1	0.248211	0
GPR65	0.248143	0
SLC35G2	0.248143	0
CNTN3	0.248054	0
KCNB1	0.248023	0
KCNH3	0.247511	0
ATP1A4	0.247476	0
ADGRL3	0.24681	0
KIR2DL4	0.246701	0
CNR2	0.246569	0
ANO2	0.246149	0
CLEC4M	0.245985	1
ABCA5	0.245781	0
ADRA1D	0.245718	0
SLC5A2	0.245691	0
NCR3LG1	0.245458	0
IL23R	0.245449	0
CNNM2	0.24542	0
GABRR2	0.245197	0
LRIG2	0.244622	0
ABCA3	0.24444	0
SLC44A2	0.244308	0
MTNR1B	0.244144	0
CLEC5A	0.243278	1
DCT	0.242671	0
PTPRO	0.242585	0
SV2B	0.242566	0
WDR13	0.242554	0
NALCN	0.242389	0
HTR7	0.242065	0
HCAR2	0.24195	0
OPRD1	0.241818	0
ADORA1	0.241514	0
PAQR8	0.241042	0
NLGN1	0.240393	0
ITGAD	0.239824	0
FFAR4	0.239718	0
KCNJ3	0.239683	0
CELSR2	0.239665	0
PLB1	0.239445	0
UNC5A	0.239378	0
LGR6	0.239337	0
PCDH20	0.239161	0
IL12RB2	0.239142	0
PCDH9	0.238986	0
SLC22A6	0.238867	0
NFAM1	0.238754	0
DAGLB	0.23875	0
TTYH1	0.238352	0
GRIK5	0.23817	0
KCND1	0.237987	0
SLC32A1	0.237921	0
CD101	0.237506	0
GYPB	0.237373	0
TACR3	0.236914	0
CACNA1A	0.236672	0
FCRL5	0.236658	0
UGT8	0.235665	0
SLC38A5	0.235652	0
TRPV6	0.235645	0
EMCN	0.235545	0
PTPRR	0.23543	0
GRIK2	0.235417	0
SLC52A2	0.234856	0
SLC24A4	0.234516	0
SCAMP5	0.234513	0
ADRB3	0.234448	0
FAM174B	0.234446	0
CLEC4G	0.234443	1
SLC19A1	0.233633	1
TRBV12-3	0.233146	0
SLC41A3	0.231892	0
FCRL4	0.231853	0
SLC2A14	0.231644	0
KCNJ12	0.231509	0
OXTR	0.231396	0
C5AR2	0.23095	0
GABRB3	0.230872	0
SEMA4F	0.230622	0
ART4	0.230154	0
CEACAM7	0.229978	0
PLXDC1	0.229403	0
SLCO1A2	0.229305	0
IL9R	0.229031	0
PTPRN2	0.228669	0
MTNR1A	0.228108	0
ZNRF3	0.227933	0
PARM1	0.227857	0
LRFN3	0.227826	0
SLC26A3	0.227728	0
FAM171A1	0.22739	0
GLRA1	0.227338	0
PTGER1	0.227103	0
BEST2	0.226998	0
ATP6V0A4	0.225847	0
TAS1R1	0.22568	0
CHRNB2	0.225481	0
GABRB1	0.224438	0
CACNG7	0.224339	0
CLCN2	0.223816	0
EPHA7	0.223417	1
EPHA6	0.223304	0
ADGRG3	0.223293	0
GFRA2	0.223287	0
FNDC5	0.221992	0
CHRNE	0.221732	0
ADGRD1	0.221564	0
SIGLEC5	0.221322	0
ELAPOR2	0.220985	0
PCDH11X	0.220974	0
SLC15A1	0.22087	0
SLC5A5	0.220567	0
SLC24A3	0.220417	0
LYSMD3	0.220369	0
CDH24	0.220342	0
CD163L1	0.220278	0
SLC13A3	0.220133	0
GPR18	0.219937	0
KCNA2	0.219916	0
GPR84	0.219759	0
OXER1	0.219514	0
SLC16A2	0.219411	0
GPR157	0.219373	0
HTR1E	0.219093	0
PRND	0.218546	0
SDK1	0.218439	0
LRRC8D	0.218329	0
GLDN	0.218113	0
GRM4	0.21781	0
GJD3	0.216943	0
CLDN8	0.216932	0
KCNMB4	0.216514	0
CALHM1	0.216459	0
TRAV8-4	0.216304	0
KIAA0319	0.215986	0
CLDN19	0.215896	0
CLCN1	0.215711	0
CDH6	0.215706	0
KCND2	0.215674	0
CD1E	0.215629	0
SLC51B	0.215601	0
HJV	0.215589	0
GPR35	0.215547	0
GPR153	0.215435	0
GABRA6	0.215428	0
MC3R	0.215368	0
LY6G6C	0.215224	0
UPK3A	0.2151	0
PCDHGB7	0.214929	0
RXFP4	0.214925	0
XPR1	0.214606	1
GRIA4	0.214377	0
HTR3B	0.214272	0
GJA8	0.213907	0
GRIA2	0.213488	0
SLITRK3	0.213281	0
BDKRB1	0.213249	0
PODXL2	0.213141	0
AQP2	0.213089	0
OPN4	0.213048	0
MUC21	0.212988	0
LILRB5	0.21297	0
SPNS2	0.212925	0
ABCA2	0.212745	0
PRSS21	0.212243	0
SDK2	0.212075	0
PTPRZ1	0.211652	0
GRIN3B	0.211564	0
FFAR3	0.21144	0
SIDT2	0.211338	0
SLC2A6	0.211292	0
CLDN6	0.211207	1
TM4SF5	0.211162	0
SEZ6L2	0.211088	0
CLDN22	0.211076	0
ATP8B4	0.211009	0
ATP10A	0.210849	0
GABRA1	0.210766	0
SLC4A5	0.21045	0
DRD5	0.210274	0
SLC13A5	0.209996	0
CHRNG	0.209856	0
ATP8A1	0.209813	0
ART1	0.209653	0
LMBRD2	0.209641	0
SV2C	0.209235	0
OPRL1	0.209112	0
CEACAM21	0.208723	0
GPR171	0.208393	0
TRPV5	0.208205	0
MUC17	0.208121	0
CDH19	0.20774	0
RAB3B	0.207585	0
OSCAR	0.2075	0
SI	0.207175	0
MRAP2	0.207006	0
SLC6A19	0.206942	0
IYD	0.206715	0
LYPD3	0.206698	0
DPEP1	0.205756	0
ADGRB3	0.205388	0
CDSN	0.205134	0
CHRNB4	0.204975	0
GPR141	0.204954	0
GPR132	0.204944	0
GNRHR	0.204564	0
SLC7A9	0.204497	0
FCRL1	0.20445	0
MEP1A	0.204284	0
LRFN2	0.204187	0
GPR149	0.204125	0
SIT1	0.204117	0
FFAR1	0.204018	0
PCDHB16	0.203968	0
TAS1R3	0.203821	0
KCNK3	0.203805	0
ECSCR	0.203598	0
GRIA3	0.203279	0
FNDC4	0.202748	0
PTCH2	0.20239	0
SLC6A9	0.202032	0
CALY	0.201353	0
CA12	0.201237	0
ASTN1	0.201187	0
PLXNA4	0.20115	0
CDH26	0.20115	0
KCNA10	0.201101	0
LYPD5	0.20008	0
MFAP3L	0.200063	0
GRIK3	0.199847	0
SLC17A6	0.19978	0
TMEM106A	0.199656	0
TMPRSS11E	0.199202	0
CACNA1B	0.198809	0
TEC	0.198369	0
ABCA4	0.198218	0
UNC5D	0.198059	0
PCDHB3	0.197677	0
CSMD3	0.197673	0
ANO9	0.197653	0
KCNG3	0.197503	0
SLC28A3	0.19727	0
RRH	0.197138	0
PPP1R16B	0.197103	0
CACNA1G	0.196643	0
SLC14A2	0.196549	0
ALPI	0.196418	0
LAX1	0.196414	0
BEST4	0.195492	0
ADCY8	0.19518	0
LHCGR	0.19504	0
SLC12A1	0.195029	0
CDH9	0.19494	0
RAET1E	0.194602	0
LY6G6F	0.194594	0
GHSR	0.194462	0
TRPC3	0.194436	0
CATSPERG	0.19423	0
COL26A1	0.194133	0
GRIK1	0.194003	0
MOSMO	0.193968	0
SLITRK1	0.193874	0
ERVFRD-1	0.193836	0
KCNQ2	0.193756	0
IL17RD	0.193557	0
SLCO1B1	0.193368	0
PCDHB12	0.192623	0
GABRB2	0.19227	0
HRH1	0.192225	0
IL17RE	0.192003	0
CD109	0.191937	0
GCGR	0.191602	0
CACNG4	0.191261	0
LILRA2	0.190757	0
CATSPERD	0.190703	0
GABRA5	0.190263	0
SUCNR1	0.190248	0
KCNK17	0.1898	0
RAET1L	0.189734	0
CHRNA6	0.189676	0
ADCY2	0.189593	0
CDHR3	0.189311	1
ILDR1	0.189307	0
SLC44A3	0.188615	0
DSC1	0.188494	0
TRPM2	0.188489	0
ADCY1	0.188405	0
LYPD2	0.187992	0
CLCA1	0.187921	0
KCNK10	0.187785	0
CRLF2	0.187719	0
SLC6A17	0.187597	0
LILRA6	0.187361	0
GABRA4	0.18718	0
LYPD1	0.187087	0
PROM2	0.186955	0
RHCG	0.186924	0
RASA4B	0.186899	0
PTGFR	0.186768	0
GPR17	0.186078	0
SLC5A8	0.185835	0
PCDHGB6	0.185459	0
CDC42SE1	0.185402	0
ADGRE3	0.185265	0
ADGRB2	0.185075	0
LRRC4B	0.184959	0
P2RY11	0.184792	0
GPR55	0.184549	0
DPP10	0.183549	0
IGSF11	0.183463	0
GFRAL	0.18338	0
KCNB2	0.183195	0
TENM4	0.182791	0
SCN11A	0.182521	0
GPR173	0.182189	0
UPK1A	0.181896	0
GRAMD1C	0.181734	0
EPHA5	0.18124	1
PCDHAC2	0.181221	0
GABRR1	0.181022	0
CLCA4	0.180912	0
RERG	0.180878	0
PROKR2	0.180699	0
PKD1L3	0.180575	0
PCDHGA4	0.18041	0
AQP8	0.180182	0
SLC10A4	0.180105	0
CRLF1	0.180079	0
ADD2	0.180049	0
GPR143	0.179987	0
CLTRN	0.179896	0
NCAM2	0.179822	0
CHRNA2	0.179596	0
SSTR1	0.179305	0
DPP6	0.179117	0
ABCC8	0.178448	0
GPR52	0.178413	0
MMP24	0.178408	0
GPR146	0.178273	0
MMP16	0.17823	0
SIDT1	0.178156	0
LY6G6D	0.178093	0
KCNK2	0.178015	0
VTCN1	0.178002	0
SLC22A17	0.177671	0
SLC34A2	0.177537	0
GALR2	0.176755	0
KCNA7	0.176748	0
F2RL3	0.17659	0
LYNX1	0.176327	0
LYPD6B	0.176114	0
SLC34A3	0.176064	0
ABCA12	0.175928	0
GRM7	0.175911	0
CHRM4	0.17563	0
LY6K	0.174719	0
KCNJ1	0.174709	0
PRTG	0.174665	0
NPSR1	0.174655	0
SSTR5	0.174591	0
MDGA1	0.174138	0
CDH18	0.173567	0
OPRK1	0.172823	0
GJA3	0.172471	0
PCDHGA10	0.172309	0
TACR2	0.170926	0
TRPM5	0.170718	0
PANX2	0.170407	0
MUC3A	0.170326	0
TENM1	0.170298	0
ASIC4	0.170132	0
PCDHGB5	0.169552	0
SCN2A	0.169355	0
CLCA2	0.169345	0
ENPP5	0.169267	0
GRAMD1B	0.169216	0
GPR75	0.169198	0
NRG3	0.169164	0
TREH	0.16866	0
HTR1D	0.168546	0
ATP4A	0.168193	0
IGHV4-34	0.168103	0
KCNK9	0.167994	0
CHRNA1	0.167507	0
GPR88	0.167061	0
SLC7A4	0.167044	0
PTH2R	0.166988	0
SCN10A	0.166827	0
GPRC5D	0.166672	0
TRHR	0.166626	0
RXFP1	0.166516	0
PCDHB5	0.166301	0
OPALIN	0.166232	0
GPR15	0.166158	1
KCNA6	0.165257	0
P2RX6	0.165213	0
TPSG1	0.16492	0
SLC1A6	0.164385	0
OTOA	0.164201	0
MUC4	0.164038	0
ADAM21	0.163995	0
KCNMB3	0.16379	0
FRAS1	0.163659	0
PCDHB1	0.163325	0
GJB4	0.163281	0
SCN1A	0.162852	0
SLC39A2	0.162742	0
DAGLA	0.162594	0
HTR5A	0.162448	0
CDH10	0.162002	0
CLRN1	0.161493	0
ISLR2	0.161368	0
GABRQ	0.160694	0
UMODL1	0.1606	0
PCDHA8	0.160185	0
LRRC15	0.160137	0
PCDHGB2	0.159892	0
SLC22A11	0.15989	0
[truncated: 844 more rows]
